# Supplementary material
Source: PubMed Central journal article supplement (PMC3265869)
Supplement: supp_M111.305938_jbc.M111.305938-1.pdf [file supp_M111.305938_jbc.M111.305938-1.pdf]

Fig. S1. Purity of the mutant enzymes used in this work

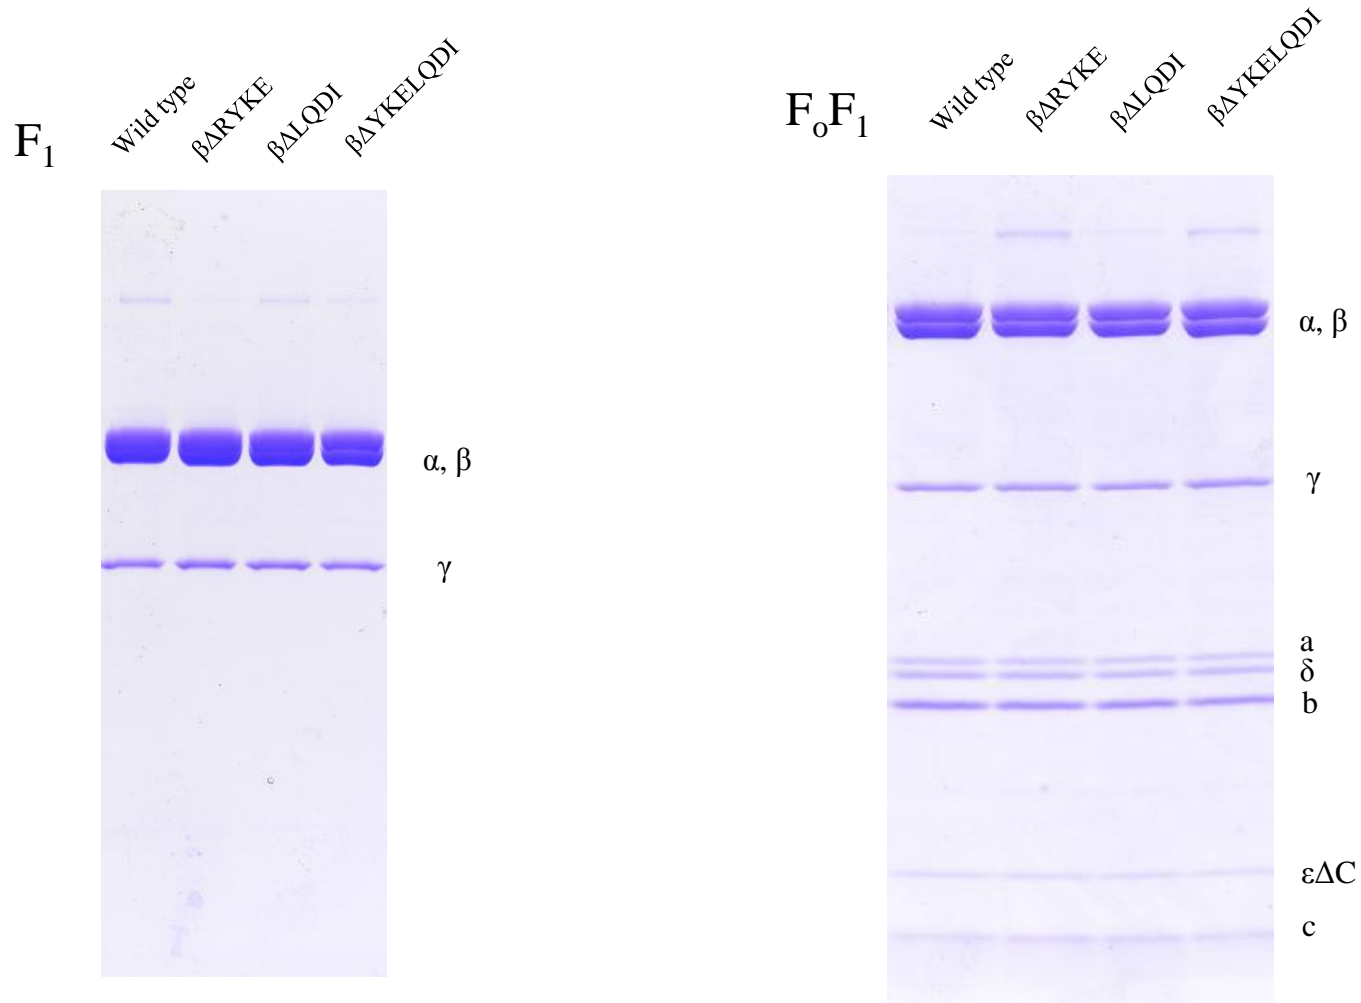

Polyacrylamide gel (10-20%) electrophoresis in the presence of sodium dodecylsulfate. Five micrograms of protein were applied.
